# Supplementary material
Source: PubMed Central journal article supplement (PMC3419400)
Supplement: 358076.f1.pdf [file 358076.f1.pdf]

**Supplemental Table 1. Selected characteristics of prostate nested case-control participants**

| Selected Characteristics                              | Prostate Cancer Cases |         | Controls |         | Chi square p |
|-------------------------------------------------------|-----------------------|---------|----------|---------|--------------|
|                                                       | n                     | (%)     | n        | (%)     |              |
| <b>All subjects</b>                                   | 776                   | (100.0) | 1,444    | (100.0) |              |
| <b>Age (years)</b>                                    |                       |         |          |         |              |
| <40                                                   | 12                    | (1.5)   | 17       | (1.2)   |              |
| 40-49                                                 | 138                   | (17.8)  | 273      | (18.9)  |              |
| 50-59                                                 | 369                   | (47.6)  | 673      | (46.6)  |              |
| 60-69                                                 | 219                   | (28.2)  | 408      | (28.3)  |              |
| ≥70                                                   | 38                    | (4.9)   | 73       | (5.1)   | 0.91         |
| <b>State of Residence</b>                             |                       |         |          |         |              |
| Iowa                                                  | 520                   | (67.0)  | 991      | (68.6)  |              |
| North Carolina                                        | 256                   | (33.0)  | 453      | (31.4)  | 0.44         |
| <b>Applicator Type</b>                                |                       |         |          |         |              |
| Private                                               | 741                   | (95.5)  | 1,363    | (94.4)  |              |
| Commercial                                            | 35                    | (4.5)   | 81       | (5.6)   | 0.27         |
| <b>First-degree family history of prostate cancer</b> |                       |         |          |         |              |
| No                                                    | 576                   | (74.2)  | 1,193    | (82.6)  |              |
| Yes                                                   | 130                   | (16.8)  | 145      | (10.0)  | <.0001       |
| <b>Prostate Cancer Stage</b>                          |                       |         |          |         |              |
| I - Local                                             | 579                   | (74.3)  | -        | -       |              |
| II - Regional                                         | 156                   | (20.1)  | -        | -       |              |
| III - Distant                                         | 12                    | (1.5)   | -        | -       |              |
| IV - Not staged                                       | 29                    | (3.7)   | -        | -       | -            |
| <b>Prostate Cancer Grade</b>                          |                       |         |          |         |              |
| Well differentiated                                   | 38                    | (4.9)   | -        | -       |              |
| Moderately differentiated                             | 547                   | (70.5)  | -        | -       |              |
| Poorly differentiated                                 | 168                   | (21.6)  | -        | -       |              |
| Undifferentiated                                      | 4                     | (0.5)   | -        | -       |              |
| Not graded                                            | 19                    | (2.4)   | -        | -       | -            |

**Supplemental Table 2. Associations between intensity-weighted lifetime days of pesticide use and prostate cancer**

| Chemical/functional class/Pesticide | Non-exposed <sup>1</sup> |     | Low Exposed  |                          | High Exposed |                          | p-trend <sup>2</sup> |
|-------------------------------------|--------------------------|-----|--------------|--------------------------|--------------|--------------------------|----------------------|
|                                     | Case/Control             |     | Case/Control | OR (95% CI) <sup>2</sup> | Case/Control | OR (95% CI) <sup>2</sup> |                      |
| <b><u>Insecticide</u></b>           |                          |     |              |                          |              |                          |                      |
| <b>Carbamate</b>                    |                          |     |              |                          |              |                          |                      |
| Carbaryl                            | 352/633                  | REF | 115/239      | 0.84 (0.65-1.09)         | 102/239      | 0.63 (0.46-0.86)         | 0.01                 |
| Carbofuran                          | 433/857                  | REF | 123/224      | 1.09 (0.85-1.40)         | 120/222      | 1.07 (0.83-1.38)         | 0.63                 |
| <b>Organochlorine (OC)</b>          |                          |     |              |                          |              |                          |                      |
| Aldrin                              | 481/896                  | REF | 66/157       | 0.82 (0.59-1.12)         | 80/156       | 0.99 (0.74-1.34)         | 0.95                 |
| Chlordane                           | 505/888                  | REF | 64/150       | 0.74 (0.54-1.01)         | 65/150       | 0.74 (0.54-1.01)         | 0.04                 |
| DDT                                 | 373/699                  | REF | 82/222       | 0.69 (0.52-0.92)         | 122/221      | 1.00 (0.77-1.30)         | 0.69                 |
| Heptachlor                          | 545/1,003                | REF | 52/116       | 0.86 (0.61-1.22)         | 47/116       | 0.78 (0.54-1.11)         | 0.15                 |
| Lindane                             | 606/1,089                | REF | 31/87        | 0.65 (0.43-1.00)         | 36/87        | 0.75 (0.50-1.12)         | 0.12                 |
| Toxaphene                           | 585/1,084                | REF | 44/81        | 1.01 (0.69-1.48)         | 35/80        | 0.75 (0.50-1.15)         | 0.19                 |
| <b>Organophosphate (OP)</b>         |                          |     |              |                          |              |                          |                      |
| Chlorpyrifos                        | 451/854                  | REF | 166/278      | 1.14 (0.91-1.43)         | 133/277      | 0.92 (0.72-1.16)         | 0.39                 |
| Coumaphos                           | 610/1,144                | REF | 36/66        | 1.02 (0.67-1.55)         | 30/66        | 0.85 (0.55-1.33)         | 0.49                 |
| DDVP                                | 603/1,123                | REF | 44/91        | 0.90 (0.62-1.32)         | 40/91        | 0.82 (0.56-1.21)         | 0.32                 |
| Diazinon                            | 513/964                  | REF | 67/123       | 1.00 (0.73-1.38)         | 47/116       | 0.72 (0.50-1.03)         | 0.08                 |
| Fonofos                             | 511/992                  | REF | 85/158       | 1.06 (0.79-1.42)         | 92/153       | 1.19 (0.89-1.59)         | 0.25                 |
| Malathion                           | 225/399                  | REF | 162/329      | 0.88 (0.69-1.13)         | 152/328      | 0.80 (0.62-1.04)         | 0.13                 |
| Parathion                           | 627/1,176                | REF | 30/43        | 1.28 (0.79-2.06)         | 22/43        | 0.91 (0.53-1.54)         | 0.73                 |
| Phorate                             | 462/846                  | REF | 80/175       | 0.90 (0.66-1.21)         | 74/174       | 0.82 (0.61-1.11)         | 0.22                 |
| Terbufos                            | 406/803                  | REF | 145/250      | 1.17 (0.92-1.50)         | 131/248      | 1.07 (0.83-1.37)         | 0.74                 |
| <b>Pyrethroid</b>                   |                          |     |              |                          |              |                          |                      |
| Permethrin (crop, animal)           | 576/1,103                | REF | 78/121       | 1.24 (0.91-1.67)         | 54/121       | 0.86 (0.61-1.20)         | 0.37                 |
| <b><u>Herbicide</u></b>             |                          |     |              |                          |              |                          |                      |
| Paraquat                            | 592/1,082                | REF | 33/86        | 0.68 (0.45-1.04)         | 40/85        | 0.78 (0.52-1.17)         | 0.24                 |
| Glyphosate                          | 182/333                  | REF | 276/540      | 0.93 (0.74-1.18)         | 275/533      | 0.94 (0.74-1.19)         | 0.78                 |
| Butylate                            | 501/903                  | REF | 52/152       | 0.63 (0.45-0.88)         | 72/139       | 0.94 (0.69-1.28)         | 0.72                 |
| EPTC                                | 530/1,063                | REF | 82/120       | 1.40 (1.03-1.90)         | 60/120       | 1.02 (0.73-1.42)         | 0.93                 |
| Atrazine                            | 189/375                  | REF | 274/517      | 1.07 (0.84-1.35)         | 273/516      | 1.06 (0.84-1.34)         | 0.77                 |
| Cyanazine                           | 391/698                  | REF | 160/305      | 0.91 (0.71-1.16)         | 129/305      | 0.73 (0.56-0.94)         | 0.02                 |
| Metribuzin                          | 433/792                  | REF | 88/188       | 0.89 (0.67-1.19)         | 86/187       | 0.87 (0.65-1.15)         | 0.34                 |
| 2,4,5-T                             | 500/898                  | REF | 85/153       | 1.02 (0.77-1.36)         | 56/153       | 0.67 (0.48-0.93)         | 0.02                 |
| 2,4-D                               | 135/218                  | REF | 293/583      | 0.82 (0.63-1.06)         | 295/583      | 0.82 (0.63-1.07)         | 0.50                 |
| Dicamba                             | 324/573                  | REF | 172/362      | 0.81 (0.63-1.04)         | 176/361      | 0.82 (0.64-1.06)         | 0.29                 |
| Alachlor                            | 277/546                  | REF | 200/388      | 1.02 (0.81-1.28)         | 194/387      | 0.99 (0.79-1.24)         | 0.86                 |
| Metolachlor                         | 369/712                  | REF | 190/304      | 1.21 (0.97-1.52)         | 119/298      | 0.77 (0.60-0.99)         | 0.02                 |
| Pendimethalin                       | 474/856                  | REF | 62/170       | 0.66 (0.48-0.90)         | 89/167       | 0.95 (0.71-1.25)         | 0.74                 |
| Trifluralin                         | 312/583                  | REF | 177/358      | 0.93 (0.74-1.18)         | 187/356      | 0.99 (0.78-1.25)         | 0.95                 |
| Imazethapyr                         | 411/773                  | REF | 161/263      | 1.17 (0.91-1.50)         | 105/262      | 0.77 (0.58-1.01)         | 0.03                 |
| Chlorimuron-ethyl                   | 487/955                  | REF | 78/140       | 1.11 (0.82-1.50)         | 65/139       | 0.91 (0.66-1.25)         | 0.58                 |
| <b><u>Fungicide</u></b>             |                          |     |              |                          |              |                          |                      |
| Benomyl                             | 662/1,242                | REF | 17/35        | 0.87 (0.48-1.58)         | 19/34        | 0.99 (0.55-1.76)         | 0.96                 |
| Captan                              | 623/1,144                | REF | 28/64        | 0.81 (0.51-1.29)         | 33/64        | 0.94 (0.61-1.45)         | 0.79                 |
| Metalaxyl                           | 590/1,113                | REF | 36/76        | 0.87 (0.57-1.31)         | 45/75        | 1.06 (0.70-1.61)         | 0.75                 |
| <b><u>Fumigant</u></b>              |                          |     |              |                          |              |                          |                      |
| Methyl bromide                      | 637/1,215                | REF | 45/101       | 0.83 (0.56-1.23)         | 61/98        | 1.15 (0.79-1.68)         | 0.38                 |
| <b><u>Other</u></b>                 |                          |     |              |                          |              |                          |                      |
| Petroleum oil/distillate            | 488/964                  | REF | 52/103       | 1.03 (0.72-1.46)         | 61/103       | 1.20 (0.86-1.68)         | 0.28                 |

Abbreviations: DDT (dichlorodiphenyltrichloroethane), DDVP (dichlorvos), EPTC (S-ethyl dipropylthiocarbamate),

2,4,5-T (2,4,5-trichlorophenoxyacetic acid), 2,4-D (2,4-dichlorophenoxyacetic acid)

<sup>a</sup>Referent group

<sup>b</sup>Adjusted for age and state

Supplemental Table 3. Prostate cancer risk in relation the lipid metabolism variants included in our interaction analyses<sup>1</sup> (sorted by Gene, SNP)

| Gene           | SNP        | Minor Allele | MinorAllele |      | OR          | (95% CI)    | p-trend | FDR p-trend |
|----------------|------------|--------------|-------------|------|-------------|-------------|---------|-------------|
|                |            |              | Frequency   |      |             |             |         |             |
| <b>A4GALT</b>  | rs6002910  | T            | 0.20        |      | 1.14        | (0.98-1.33) | 0.09    | 0.09        |
|                | rs8136914  | G            | 0.25        |      | 1.14        | (0.98-1.31) | 0.08    | 0.09        |
| <b>ABCA1</b>   | rs2065412  | C            | 0.42        |      | 1.14        | (1.00-1.29) | 0.04    | 0.20        |
|                | rs2246293  | G            | 0.46        |      | 0.92        | (0.81-1.04) | 0.17    | 0.20        |
|                | rs2437820  | G            | 0.45        |      | 1.09        | (0.97-1.24) | 0.15    | 0.20        |
|                | rs2472496  | G            | 0.42        |      | 1.09        | (0.96-1.23) | 0.20    | 0.20        |
|                | rs2482430  | T            | 0.15        |      | 1.20        | (1.02-1.40) | 0.03    | 0.20        |
|                | rs2515617  | A            | 0.44        |      | 0.91        | (0.81-1.03) | 0.15    | 0.20        |
|                | rs2515629  | G            | 0.17        |      | 0.87        | (0.73-1.03) | 0.10    | 0.20        |
|                | rs2740484  | T            | 0.35        |      | 1.11        | (0.98-1.26) | 0.11    | 0.20        |
|                | rs3905001  | C            | 0.25        |      | 1.10        | (0.96-1.27) | 0.16    | 0.20        |
|                | rs4149313  | C            | 0.13        |      | 0.88        | (0.73-1.07) | 0.20    | 0.20        |
|                | rs4149336  | G            | 0.19        |      | 0.87        | (0.74-1.02) | 0.09    | 0.20        |
| rs4149338      | A          | 0.30         |             | 0.88 | (0.77-1.01) | 0.08        | 0.20    |             |
| <b>ABCG5</b>   | rs10205816 | G            | 0.26        |      | 1.16        | (1.01-1.33) | 0.04    | 0.04        |
|                | rs1835815  | T            | 0.28        |      | 1.22        | (1.07-1.39) | 0.004   | 0.01        |
|                | rs2278356  | C            | 0.31        |      | 1.22        | (1.07-1.40) | 0.003   | 0.01        |
|                | rs4148214  | T            | 0.46        |      | 0.87        | (0.77-0.99) | 0.03    | 0.04        |
|                | rs4245786  | G            | 0.23        |      | 1.12        | (0.97-1.30) | 0.12    | 0.12        |
|                | rs4952683  | G            | 0.19        |      | 1.21        | (1.04-1.41) | 0.02    | 0.04        |
|                | rs6709904  | G            | 0.10        |      | 1.23        | (1.02-1.49) | 0.03    | 0.04        |
| <b>ABCG8</b>   | rs17606027 | C            | 0.10        |      | 1.26        | (1.04-1.52) | 0.02    | 0.11        |
|                | rs2954804  | T            | 0.28        |      | 0.88        | (0.76-1.01) | 0.06    | 0.13        |
|                | rs2954805  | C            | 0.31        |      | 1.11        | (0.97-1.28) | 0.13    | 0.16        |
|                | rs2954807  | T            | 0.28        |      | 1.10        | (0.96-1.26) | 0.17    | 0.17        |
|                | rs4148217  | A            | 0.21        |      | 0.87        | (0.75-1.02) | 0.08    | 0.13        |
|                | rs4953028  | A            | 0.43        |      | 1.12        | (0.99-1.27) | 0.08    | 0.13        |
| <b>ACSL5</b>   | rs11195943 | T            | 0.10        |      | 1.25        | (1.03-1.52) | 0.02    | 0.08        |
|                | rs12098576 | T            | 0.14        |      | 0.87        | (0.72-1.04) | 0.12    | 0.14        |
|                | rs17674469 | G            | 0.12        |      | 1.18        | (0.98-1.41) | 0.08    | 0.14        |
|                | rs2290965  | C            | 0.11        |      | 1.26        | (1.04-1.52) | 0.02    | 0.08        |
|                | rs2419621  | T            | 0.27        |      | 0.89        | (0.78-1.03) | 0.12    | 0.14        |
| rs2419627      | T          | 0.27         |             | 0.89 | (0.77-1.03) | 0.10        | 0.14    |             |
| <b>ACSL5</b>   | rs876873   | C            | 0.16        |      | 0.89        | (0.74-1.06) | 0.17    | 0.17        |
| <b>ADIPOR1</b> | rs12733285 | T            | 0.28        |      | 1.12        | (0.98-1.28) | 0.09    | 0.11        |
|                | rs1342387  | T            | 0.43        |      | 1.14        | (1.00-1.29) | 0.05    | 0.11        |
|                | rs16850799 | A            | 0.23        |      | 0.89        | (0.76-1.03) | 0.11    | 0.11        |
|                | rs2275737  | A            | 0.41        |      | 1.13        | (0.99-1.28) | 0.06    | 0.11        |
| <b>ADIPOR2</b> | rs4766415  | T            | 0.48        |      | 1.11        | (0.98-1.25) | 0.11    | 0.11        |
| <b>ADRB2</b>   | rs17640574 | A            | 0.19        |      | 0.89        | (0.76-1.04) | 0.15    | 0.18        |
|                | rs30297    | A            | 0.14        |      | 0.88        | (0.73-1.05) | 0.16    | 0.18        |
|                | rs877741   | C            | 0.18        |      | 1.12        | (0.95-1.31) | 0.18    | 0.18        |
| <b>ALOX12</b>  | rs1042356  | G            | 0.41        |      | 1.10        | (0.97-1.25) | 0.13    | 0.14        |
|                | rs311740   | C            | 0.36        |      | 1.10        | (0.97-1.26) | 0.14    | 0.14        |
|                | rs312466   | A            | 0.40        |      | 1.11        | (0.98-1.27) | 0.10    | 0.14        |
|                | rs6502997  | A            | 0.35        |      | 1.13        | (0.99-1.28) | 0.07    | 0.14        |
|                | rs7338     | C            | 0.16        |      | 0.82        | (0.69-0.99) | 0.03    | 0.14        |
| <b>ALOX15</b>  | rs916055   | G            | 0.35        |      | 0.91        | (0.79-1.04) | 0.16    | 0.16        |
| <b>ALOX15B</b> | rs2816     | T            | 0.47        |      | 1.11        | (0.98-1.26) | 0.10    | 0.19        |
|                | rs4287627  | A            | 0.14        |      | 1.12        | (0.94-1.34) | 0.19    | 0.19        |
|                | rs6503072  | C            | 0.19        |      | 1.11        | (0.95-1.30) | 0.18    | 0.19        |
| <b>ALOX5</b>   | rs7099684  | A            | 0.20        |      | 1.13        | (0.96-1.32) | 0.13    | 0.13        |
| <b>ALOX5AP</b> | rs4238139  | G            | 0.25        |      | 1.14        | (0.99-1.31) | 0.07    | 0.15        |
|                | rs4319601  | T            | 0.37        |      | 1.14        | (1.01-1.30) | 0.04    | 0.15        |
|                | rs9285076  | A            | 0.20        |      | 1.11        | (0.95-1.29) | 0.19    | 0.19        |
|                | rs9579645  | C            | 0.12        |      | 0.86        | (0.71-1.05) | 0.13    | 0.17        |
| <b>ALOXE3</b>  | rs3027208  | T            | 0.14        |      | 1.18        | (1.00-1.40) | 0.06    | 0.09        |
|                | rs3027279  | G            | 0.40        |      | 1.12        | (0.99-1.28) | 0.07    | 0.09        |
|                | rs4792239  | G            | 0.23        |      | 1.12        | (0.97-1.29) | 0.13    | 0.15        |
|                | rs6503086  | G            | 0.44        |      | 0.83        | (0.73-0.94) | 0.003   | 0.02        |
|                | rs7215288  | C            | 0.17        |      | 1.20        | (1.03-1.41) | 0.02    | 0.06        |
|                | rs7215658  | C            | 0.20        |      | 1.20        | (1.03-1.40) | 0.02    | 0.06        |
|                | rs8067165  | C            | 0.39        |      | 1.09        | (0.96-1.23) | 0.20    | 0.20        |
|                | rs9912048  | T            | 0.32        |      | 0.87        | (0.76-1.00) | 0.05    | 0.09        |
| <b>AMACR</b>   | rs299602   | A            | 0.31        |      | 1.17        | (1.03-1.34) | 0.02    | 0.04        |
|                | rs6863657  | A            | 0.11        |      | 0.77        | (0.62-0.96) | 0.02    | 0.04        |
|                | rs840385   | C            | 0.37        |      | 1.13        | (1.00-1.28) | 0.06    | 0.06        |
|                | rs840386   | T            | 0.34        |      | 1.13        | (1.00-1.29) | 0.06    | 0.06        |
| <b>APOB</b>    | rs515135   | T            | 0.17        |      | 1.12        | (0.95-1.31) | 0.18    | 0.18        |
| <b>APOE</b>    | rs2075650  | G            | 0.15        |      | 0.88        | (0.74-1.06) | 0.18    | 0.18        |
|                | rs405697   | A            | 0.23        |      | 1.15        | (1.00-1.33) | 0.06    | 0.12        |
| <b>ATP1B1</b>  | rs1200131  | A            | 0.32        |      | 0.87        | (0.76-1.00) | 0.05    | 0.10        |

|                |            |   |      |      |              |       |      |
|----------------|------------|---|------|------|--------------|-------|------|
|                | rs1200132  | G | 0.22 | 0.89 | (0.76-1.04)  | 0.13  | 0.13 |
| <b>BPI</b>     | rs1341022  | G | 0.45 | 1.10 | (0.97-1.25)  | 0.14  | 0.17 |
|                | rs1341023  | C | 0.45 | 1.10 | (0.97-1.25)  | 0.13  | 0.17 |
|                | rs4811656  | G | 0.20 | 0.88 | (0.75-1.03)  | 0.10  | 0.17 |
|                | rs6024718  | A | 0.18 | 1.14 | (0.97-1.33)  | 0.11  | 0.17 |
|                | rs6069597  | T | 0.46 | 1.09 | (0.96-1.23)  | 0.18  | 0.18 |
| <b>CAV1</b>    | rs10270569 | T | 0.26 | 0.88 | (0.76-1.01)  | 0.07  | 0.15 |
|                | rs1049337  | T | 0.27 | 1.12 | (0.98-1.28)  | 0.11  | 0.15 |
|                | rs1052990  | G | 0.35 | 0.91 | (0.80-1.03)  | 0.15  | 0.15 |
|                | rs4236601  | A | 0.27 | 0.90 | (0.78-1.03)  | 0.13  | 0.15 |
|                | rs8713     | C | 0.17 | 0.89 | (0.75-1.05)  | 0.15  | 0.15 |
|                | rs8940     | G | 0.17 | 0.85 | (0.72-1.01)  | 0.06  | 0.15 |
| <b>CETP</b>    | rs12708974 | T | 0.11 | 1.15 | (0.95-1.39)  | 0.15  | 0.15 |
|                | rs247615   | G | 0.21 | 1.17 | (1.01-1.35)  | 0.04  | 0.15 |
|                | rs289742   | C | 0.13 | 0.85 | (0.70-1.03)  | 0.09  | 0.15 |
|                | rs3764261  | A | 0.33 | 0.90 | (0.79-1.03)  | 0.12  | 0.15 |
| <b>CYP2W1</b>  | rs1007766  | G | 0.49 | 1.14 | (1.01-1.29)  | 0.04  | 0.08 |
|                | rs10257195 | T | 0.48 | 1.15 | (1.02-1.30)  | 0.02  | 0.07 |
|                | rs10264122 | T | 0.39 | 1.11 | (0.98-1.26)  | 0.10  | 0.15 |
|                | rs10272099 | C | 0.33 | 0.91 | (0.80-1.04)  | 0.16  | 0.16 |
|                | rs10274964 | T | 0.45 | 0.87 | (0.76-0.98)  | 0.02  | 0.07 |
|                | rs7807150  | A | 0.13 | 0.87 | (0.72-1.05)  | 0.15  | 0.16 |
| <b>CYP4F11</b> | rs12977516 | C | 0.47 | 0.92 | (0.81-1.04)  | 0.18  | 0.18 |
|                | rs2305804  | G | 0.12 | 1.13 | (0.95-1.36)  | 0.17  | 0.18 |
| <b>CYP4F12</b> | rs11085969 | A | 0.19 | 1.12 | (0.96-1.30)  | 0.15  | 0.15 |
|                | rs12976669 | C | 0.30 | 0.89 | (0.77-1.02)  | 0.08  | 0.15 |
| <b>CYP4F2</b>  | rs2018454  | G | 0.17 | 1.14 | (0.97-1.34)  | 0.11  | 0.12 |
|                | rs2886297  | A | 0.32 | 0.90 | (0.79-1.03)  | 0.12  | 0.12 |
| <b>CYP4X1</b>  | rs12041262 | A | 0.27 | 0.88 | (0.77-1.02)  | 0.09  | 0.15 |
|                | rs9728169  | A | 0.36 | 0.91 | (0.80-1.04)  | 0.15  | 0.15 |
| <b>CYP4Z1</b>  | rs11211436 | A | 0.27 | 0.90 | (0.78-1.03)  | 0.13  | 0.13 |
| <b>ENPP1</b>   | rs1409183  | G | 0.13 | 1.20 | (1.00-1.44)  | 0.05  | 0.13 |
|                | rs6925433  | A | 0.33 | 0.91 | (0.79-1.03)  | 0.14  | 0.17 |
|                | rs703184   | C | 0.14 | 1.18 | (0.99-1.41)  | 0.06  | 0.13 |
|                | rs7753048  | T | 0.11 | 0.84 | (0.68-1.03)  | 0.09  | 0.13 |
|                | rs9493099  | C | 0.28 | 0.87 | (0.76-1.01)  | 0.07  | 0.13 |
|                | rs9493105  | T | 0.11 | 0.87 | (0.70-1.07)  | 0.19  | 0.19 |
| <b>FASN</b>    | rs1140616  | G | 0.45 | 0.92 | (0.81-1.04)  | 0.19  | 0.19 |
|                | rs4246444  | T | 0.25 | 0.86 | (0.74-0.99)  | 0.04  | 0.12 |
|                | rs8066956  | T | 0.22 | 0.90 | (0.78-1.05)  | 0.19  | 0.19 |
| <b>FOXA3</b>   | rs11669442 | C | 0.31 | 1.18 | (1.03-1.35)  | 0.01  | 0.04 |
|                | rs7258364  | C | 0.34 | 0.90 | (0.79-1.02)  | 0.11  | 0.11 |
|                | rs8103278  | A | 0.33 | 1.15 | (1.01-1.30)  | 0.04  | 0.06 |
| <b>FOXO3A</b>  | rs12207868 | G | 0.11 | 1.14 | (0.94-1.38)  | 0.19  | 0.19 |
| <b>GCG</b>     | rs2892827  | T | 0.22 | 0.90 | (0.77-1.04)  | 0.16  | 0.18 |
|                | rs7599142  | T | 0.42 | 1.09 | (0.96-1.23)  | 0.18  | 0.18 |
| <b>GHRL</b>    | rs2619507  | G | 0.13 | 0.86 | (0.71-1.04)  | 0.12  | 0.12 |
|                | rs42451    | T | 0.28 | 1.12 | (0.98-1.29)  | 0.09  | 0.12 |
|                | rs696220   | A | 0.38 | 0.87 | (0.77-0.99)  | 0.04  | 0.11 |
| <b>LBP</b>     | rs1609800  | T | 0.45 | 1.16 | (1.03-1.31)  | 0.02  | 0.06 |
|                | rs1619859  | A | 0.48 | 1.11 | (0.99-1.26)  | 0.08  | 0.13 |
|                | rs1739640  | T | 0.47 | 1.09 | (0.96-1.23)  | 0.19  | 0.19 |
|                | rs1780623  | T | 0.40 | 0.85 | (0.74-0.96)  | 0.01  | 0.06 |
|                | rs1780629  | C | 0.27 | 0.89 | (0.77-1.03)  | 0.11  | 0.13 |
|                | rs2425362  | C | 0.36 | 0.90 | (0.79-1.02)  | 0.10  | 0.13 |
|                | rs745144   | T | 0.44 | 1.13 | (1.00-1.28)  | 0.05  | 0.11 |
| <b>LDLR</b>    | rs1799898  | T | 0.12 | 1.16 | (0.96-1.386) | 0.12  | 0.12 |
|                | rs8110695  | A | 0.23 | 0.87 | (0.75-1.014) | 0.08  | 0.12 |
| <b>LPL</b>     | rs270      | A | 0.17 | 0.89 | (0.75-1.056) | 0.19  | 0.19 |
|                | rs3200218  | G | 0.25 | 0.90 | (0.78-1.04)  | 0.15  | 0.19 |
|                | rs326      | G | 0.29 | 1.10 | (0.96-1.253) | 0.18  | 0.19 |
| <b>LRP1</b>    | rs10876966 | T | 0.21 | 1.11 | (0.96-1.284) | 0.17  | 0.17 |
|                | rs1800159  | A | 0.30 | 1.17 | (1.03-1.334) | 0.02  | 0.08 |
|                | rs6581128  | A | 0.32 | 1.11 | (0.97-1.258) | 0.13  | 0.16 |
|                | rs7956957  | C | 0.35 | 1.12 | (0.99-1.273) | 0.08  | 0.15 |
|                | rs7978567  | T | 0.33 | 1.12 | (0.98-1.271) | 0.09  | 0.15 |
| <b>LRP2</b>    | rs1003456  | A | 0.19 | 0.84 | (0.71-0.99)  | 0.04  | 0.09 |
|                | rs10490131 | G | 0.13 | 1.24 | (1.05-1.47)  | 0.01  | 0.04 |
|                | rs2111187  | T | 0.29 | 0.89 | (0.77-1.02)  | 0.09  | 0.14 |
|                | rs2239595  | A | 0.11 | 1.33 | (1.11-1.61)  | 0.002 | 0.04 |
|                | rs2239602  | C | 0.10 | 1.18 | (0.97-1.44)  | 0.11  | 0.15 |
|                | rs2247506  | C | 0.19 | 1.21 | (1.04-1.41)  | 0.01  | 0.04 |
|                | rs2268365  | C | 0.11 | 1.27 | (1.05-1.53)  | 0.01  | 0.04 |
|                | rs2268372  | A | 0.18 | 1.22 | (1.04-1.42)  | 0.01  | 0.04 |
|                | rs2268373  | G | 0.23 | 1.12 | (0.97-1.29)  | 0.13  | 0.15 |
|                | rs2302694  | A | 0.11 | 0.77 | (0.62-0.96)  | 0.02  | 0.05 |

|                |            |   |      |      |             |       |      |
|----------------|------------|---|------|------|-------------|-------|------|
|                | rs2544374  | G | 0.19 | 1.16 | (1.00-1.35) | 0.05  | 0.09 |
|                | rs2673164  | C | 0.28 | 0.83 | (0.72-0.95) | 0.01  | 0.04 |
|                | rs741378   | G | 0.45 | 1.11 | (0.97-1.25) | 0.12  | 0.15 |
|                | rs7575260  | A | 0.22 | 0.89 | (0.77-1.04) | 0.14  | 0.15 |
|                | rs830958   | G | 0.12 | 0.82 | (0.67-1.01) | 0.06  | 0.11 |
|                | rs831004   | C | 0.42 | 0.90 | (0.79-1.02) | 0.10  | 0.14 |
|                | rs9789747  | C | 0.17 | 1.11 | (0.95-1.30) | 0.19  | 0.19 |
|                | rs990626   | G | 0.25 | 0.90 | (0.77-1.04) | 0.14  | 0.15 |
| <b>LRP5</b>    | rs312016   | T | 0.28 | 1.10 | (0.96-1.26) | 0.17  | 0.20 |
|                | rs312788   | G | 0.41 | 0.91 | (0.80-1.04) | 0.15  | 0.20 |
|                | rs729635   | C | 0.11 | 0.87 | (0.71-1.08) | 0.20  | 0.20 |
|                | rs7944040  | C | 0.45 | 0.90 | (0.79-1.02) | 0.10  | 0.20 |
| <b>LRP6</b>    | rs11054724 | G | 0.47 | 0.92 | (0.81-1.04) | 0.18  | 0.18 |
| <b>LTA4H</b>   | rs2660846  | A | 0.19 | 0.89 | (0.76-1.05) | 0.17  | 0.17 |
|                | rs2660848  | C | 0.23 | 0.89 | (0.77-1.04) | 0.14  | 0.17 |
| <b>LTC4S</b>   | rs1019443  | G | 0.44 | 1.10 | (0.97-1.24) | 0.15  | 0.15 |
|                | rs3797762  | G | 0.34 | 1.13 | (0.99-1.28) | 0.07  | 0.14 |
| <b>NR1H3</b>   | rs2291119  | T | 0.30 | 0.91 | (0.79-1.04) | 0.18  | 0.18 |
|                | rs3758674  | C | 0.13 | 1.23 | (1.03-1.46) | 0.02  | 0.05 |
| <b>PFKP</b>    | rs11251694 | C | 0.19 | 1.15 | (0.98-1.33) | 0.08  | 0.17 |
|                | rs2306305  | G | 0.25 | 0.90 | (0.78-1.04) | 0.14  | 0.19 |
|                | rs6602024  | A | 0.11 | 0.80 | (0.65-0.99) | 0.04  | 0.17 |
|                | rs9423477  | A | 0.46 | 1.09 | (0.96-1.23) | 0.19  | 0.19 |
| <b>PPARA</b>   | rs4253655  | A | 0.15 | 1.24 | (1.05-1.46) | 0.01  | 0.02 |
|                | rs6007662  | G | 0.25 | 1.20 | (1.04-1.38) | 0.01  | 0.02 |
|                | rs8138102  | G | 0.20 | 1.12 | (0.96-1.31) | 0.14  | 0.14 |
| <b>PPARD</b>   | rs4713858  | A | 0.15 | 0.89 | (0.74-1.06) | 0.20  | 0.20 |
| <b>PPARG</b>   | rs13090265 | G | 0.12 | 1.17 | (0.97-1.40) | 0.10  | 0.15 |
|                | rs2920499  | G | 0.48 | 0.91 | (0.81-1.03) | 0.15  | 0.15 |
| <b>PTGDS</b>   | rs11145951 | T | 0.48 | 0.92 | (0.81-1.04) | 0.17  | 0.17 |
| <b>PTGIS</b>   | rs576119   | G | 0.26 | 1.10 | (0.96-1.26) | 0.19  | 0.19 |
|                | rs6095543  | C | 0.16 | 1.14 | (0.97-1.34) | 0.11  | 0.19 |
| <b>RETN</b>    | rs10401670 | T | 0.44 | 1.09 | (0.96-1.23) | 0.19  | 0.19 |
|                | rs12610253 | G | 0.32 | 1.13 | (0.99-1.28) | 0.07  | 0.10 |
|                | rs7408174  | C | 0.30 | 0.85 | (0.75-0.98) | 0.02  | 0.07 |
| <b>RXRA</b>    | rs10881582 | A | 0.23 | 1.11 | (0.96-1.28) | 0.17  | 0.19 |
|                | rs12339187 | G | 0.18 | 1.11 | (0.95-1.30) | 0.19  | 0.19 |
| <b>RXRB</b>    | rs2744505  | G | 0.14 | 1.15 | (0.97-1.37) | 0.12  | 0.12 |
|                | rs421446   | G | 0.27 | 1.15 | (1.00-1.33) | 0.05  | 0.12 |
|                | rs9277935  | T | 0.20 | 1.14 | (0.98-1.33) | 0.08  | 0.12 |
| <b>SCARB1</b>  | rs10744182 | C | 0.41 | 0.89 | (0.79-1.02) | 0.09  | 0.18 |
|                | rs10846745 | G | 0.43 | 1.09 | (0.96-1.23) | 0.17  | 0.18 |
|                | rs4765180  | T | 0.44 | 0.90 | (0.79-1.02) | 0.10  | 0.18 |
|                | rs4765622  | A | 0.46 | 1.09 | (0.96-1.23) | 0.18  | 0.18 |
|                | rs4765633  | A | 0.43 | 1.12 | (0.99-1.27) | 0.06  | 0.18 |
|                | rs7954697  | C | 0.43 | 1.09 | (0.96-1.24) | 0.17  | 0.18 |
|                | rs838873   | C | 0.15 | 0.82 | (0.68-0.98) | 0.03  | 0.18 |
| <b>SEC14L2</b> | rs1061664  | A | 0.20 | 1.12 | (0.96-1.30) | 0.14  | 0.14 |
|                | rs2072159  | A | 0.25 | 1.14 | (0.99-1.31) | 0.06  | 0.13 |
| <b>SIM1</b>    | rs1847912  | G | 0.25 | 0.91 | (0.79-1.05) | 0.20  | 0.20 |
|                | rs241815   | G | 0.14 | 1.14 | (0.95-1.36) | 0.15  | 0.20 |
|                | rs3798483  | C | 0.19 | 1.18 | (1.01-1.38) | 0.03  | 0.10 |
| <b>TBXAS1</b>  | rs11761051 | C | 0.25 | 1.14 | (0.99-1.32) | 0.07  | 0.12 |
|                | rs11772680 | C | 0.12 | 0.87 | (0.71-1.06) | 0.17  | 0.19 |
|                | rs12667080 | A | 0.16 | 1.13 | (0.96-1.34) | 0.15  | 0.18 |
|                | rs2284212  | A | 0.28 | 1.22 | (1.07-1.40) | 0.004 | 0.04 |
|                | rs3779130  | C | 0.35 | 1.16 | (1.02-1.32) | 0.03  | 0.09 |
|                | rs3801148  | C | 0.48 | 1.16 | (1.03-1.31) | 0.02  | 0.09 |
|                | rs3801150  | T | 0.32 | 1.15 | (1.00-1.31) | 0.04  | 0.09 |
|                | rs4726499  | G | 0.25 | 0.91 | (0.78-1.05) | 0.19  | 0.19 |
|                | rs7785584  | C | 0.34 | 0.90 | (0.79-1.03) | 0.11  | 0.16 |
|                | rs7806848  | C | 0.32 | 1.15 | (1.01-1.31) | 0.04  | 0.09 |
| <b>UCP1</b>    | rs7696769  | C | 0.32 | 0.90 | (0.79-1.03) | 0.14  | 0.14 |
| <b>UCP2</b>    | rs1685354  | G | 0.26 | 0.85 | (0.74-0.98) | 0.03  | 0.08 |
|                | rs1685356  | T | 0.45 | 1.12 | (0.99-1.26) | 0.08  | 0.08 |
|                | rs2306820  | C | 0.31 | 0.86 | (0.75-0.98) | 0.03  | 0.08 |
|                | rs2632723  | C | 0.22 | 0.87 | (0.75-1.01) | 0.07  | 0.08 |
|                | rs599277   | A | 0.46 | 0.89 | (0.78-1.01) | 0.06  | 0.08 |
|                | rs647126   | G | 0.49 | 0.89 | (0.78-1.01) | 0.07  | 0.08 |
| <b>UCP3</b>    | rs1726764  | C | 0.47 | 1.17 | (1.04-1.33) | 0.01  | 0.03 |
|                | rs2075577  | G | 0.44 | 1.12 | (0.99-1.26) | 0.07  | 0.07 |
|                | rs2734827  | A | 0.35 | 0.88 | (0.77-1.00) | 0.05  | 0.07 |

<sup>1</sup> Variants with a Hardy Weinberg Equilibrium p-value>0.001, a minor allele frequency >=0.1, and a p-trend for the additive effect of each allele<0.2

Supplemental Table 4. Associations between intensity-weighted lifetime days of pesticide use and prostate cancer risk stratified by SNPs (sorted by Pesticide, Gene, SNP)

| Pesticide                  | Gene      | SNP        | Genotype | Non-exposed  |        | Low Exposed  |                 |                       |                | High Exposed |                 |                       |                | Exposure Trend  |                       |                | p-interaction <sup>1</sup> | FDR p-interaction <sup>1</sup> |
|----------------------------|-----------|------------|----------|--------------|--------|--------------|-----------------|-----------------------|----------------|--------------|-----------------|-----------------------|----------------|-----------------|-----------------------|----------------|----------------------------|--------------------------------|
|                            |           |            |          | Case/Control | REF    | Case/Control | OR <sup>1</sup> | (95% CI) <sup>1</sup> | p <sup>1</sup> | Case/Control | OR <sup>1</sup> | (95% CI) <sup>1</sup> | p <sup>1</sup> | OR <sup>1</sup> | (95% CI) <sup>1</sup> | p <sup>1</sup> |                            |                                |
| <b><u>Insecticides</u></b> |           |            |          |              |        |              |                 |                       |                |              |                 |                       |                |                 |                       |                |                            |                                |
| Carbofuran                 | A4GALT    | rs8136914  | AA       | 210/477      | REF    | 69/128       | 1.22            | (0.87-1.71)           | 0.25           | 72/115       | 1.43            | (1.02-2.00)           | 0.04           | 1.20            | (1.02-1.41)           | 0.03           | 0.02                       | 0.03                           |
|                            |           |            | AG+GG    | 222/378      | REF    | 54/93        | 1.01            | (0.69-1.47)           | 0.96           | 48/107       | 0.76            | (0.52-1.12)           | 0.17           | 0.89            | (0.75-1.07)           | 0.22           |                            |                                |
|                            | LDLR      | rs8110695  | TT       | 285/509      | REF    | 76/132       | 1.04            | (0.75-1.43)           | 0.82           | 64/138       | 0.83            | (0.60-1.16)           | 0.27           | 0.93            | (0.80-1.09)           | 0.36           |                            |                                |
|                            |           |            | AT+AA    | 145/342      | REF    | 47/92        | 1.17            | (0.78-1.76)           | 0.44           | 55/83        | 1.58            | (1.06-2.33)           | 0.02           | 1.24            | (1.03-1.51)           | 0.02           |                            |                                |
|                            | UCP2      | rs2632723  | TT       | 263/528      | REF    | 81/129       | 1.26            | (0.92-1.73)           | 0.15           | 91/132       | 1.39            | (1.02-1.88)           | 0.04           | 1.19            | (1.02-1.38)           | 0.02           |                            |                                |
|                            |           |            | CT+CC    | 170/327      | REF    | 42/93        | 0.87            | (0.58-1.32)           | 0.51           | 28/89        | 0.61            | (0.38-0.97)           | 0.04           | 0.80            | (0.64-0.99)           | 0.04           |                            |                                |
| Fonofos                    | ABCG8     | rs2954807  | GG       | 236/509      | REF    | 50/67        | 1.62            | (1.07-2.45)           | 0.02           | 50/70        | 1.57            | (1.04-2.37)           | 0.03           | 1.30            | (1.07-1.58)           | 0.01           | 0.01                       | 0.02                           |
|                            |           |            | GT+TT    | 275/483      | REF    | 35/91        | 0.68            | (0.44-1.05)           | 0.08           | 42/83        | 0.93            | (0.61-1.40)           | 0.71           | 0.91            | (0.75-1.12)           | 0.38           |                            |                                |
|                            | rs4953028 | GG         | 141/345  | REF          | 26/38  | 1.73         | (0.99-3.00)     | 0.05                  | 36/46          | 1.94         | (1.17-3.20)     | 0.01                  | 1.43           | (1.12-1.82)     | 0.004                 |                |                            |                                |
|                            |           | AG+AA      | 368/644  | REF          | 59/120 | 0.89         | (0.63-1.25)     | 0.50                  | 56/106         | 0.95         | (0.66-1.36)     | 0.77                  | 0.96           | (0.81-1.14)     | 0.63                  |                |                            |                                |
|                            | BPI       | rs6024718  | GG       | 341/646      | REF    | 53/121       | 0.87            | (0.60-1.24)           | 0.43           | 50/103       | 0.96            | (0.66-1.40)           | 0.84           | 0.96            | (0.80-1.15)           | 0.66           |                            |                                |
|                            |           |            | AG+AA    | 170/346      | REF    | 32/36        | 1.77            | (1.05-2.99)           | 0.03           | 42/50        | 1.64            | (1.03-2.61)           | 0.04           | 1.33            | (1.06-1.66)           | 0.01           |                            |                                |
| Parathion                  | ACSL5     | rs2419627  | CC       | 365/629      | REF    | 16/18        | 1.50            | (0.75-3.00)           | 0.25           | 18/15        | 2.04            | (1.01-4.15)           | 0.05           | 1.44            | (1.05-1.99)           | 0.03           | 0.003                      | 0.02                           |
|                            |           |            | CT+TT    | 262/545      | REF    | 14/25        | 1.13            | (0.57-2.21)           | 0.73           | 4/28         | 0.27            | (0.09-0.79)           | 0.02           | 0.66            | (0.45-0.99)           | 0.04           |                            |                                |
| Permethrin                 | ALOX5AP   | rs9579645  | AA       | 466/841      | REF    | 56/101       | 0.99            | (0.70-1.40)           | 0.94           | 37/98        | 0.67            | (0.45-1.00)           | 0.05           | 0.85            | (0.71-1.02)           | 0.08           | 0.01                       | 0.02                           |
|                            |           |            | AC+CC    | 109/260      | REF    | 20/20        | 2.66            | (1.35-5.25)           | 0.005          | 16/23        | 1.98            | (0.98-3.98)           | 0.06           | 1.57            | (1.14-2.17)           | 0.01           |                            |                                |
| Terbufos                   | ADIPOR1   | rs12733285 | CC       | 183/421      | REF    | 74/123       | 1.39            | (0.98-1.96)           | 0.07           | 80/131       | 1.43            | (1.02-1.99)           | 0.04           | 1.21            | (1.03-1.43)           | 0.02           | 0.01                       | 0.02                           |
|                            |           |            | CT+TT    | 223/372      | REF    | 70/126       | 0.96            | (0.68-1.35)           | 0.80           | 51/117       | 0.75            | (0.52-1.10)           | 0.14           | 0.88            | (0.74-1.05)           | 0.16           |                            |                                |
|                            | ALOX12    | rs1042356  | AA       | 135/240      | REF    | 42/92        | 0.84            | (0.55-1.30)           | 0.44           | 39/101       | 0.71            | (0.46-1.10)           | 0.13           | 0.84            | (0.68-1.04)           | 0.12           |                            |                                |
|                            |           |            | AG+GG    | 270/563      | REF    | 103/156      | 1.39            | (1.04-1.87)           | 0.03           | 92/146       | 1.33            | (0.98-1.80)           | 0.06           | 1.18            | (1.02-1.37)           | 0.03           |                            |                                |
|                            | ALOXE3    | rs3027208  | CC       | 307/576      | REF    | 102/195      | 0.99            | (0.74-1.31)           | 0.93           | 81/188       | 0.81            | (0.60-1.10)           | 0.18           | 0.91            | (0.79-1.05)           | 0.22           |                            |                                |
|                            |           |            | CT+TT    | 99/227       | REF    | 43/55        | 1.86            | (1.16-2.99)           | 0.01           | 50/60        | 2.00            | (1.28-3.15)           | 0.00           | 1.45            | (1.16-1.81)           | 0.001          |                            |                                |
|                            | rs7215288 | TT         | 280/532  | REF          | 94/187 | 0.94         | (0.70-1.26)     | 0.67                  | 71/165         | 0.80         | (0.58-1.11)     | 0.18                  | 0.90           | (0.77-1.05)     | 0.19                  |                |                            |                                |
|                            |           | CT+CC      | 120/263  | REF          | 50/59  | 2.02         | (1.30-3.16)     | 0.002                 | 60/77          | 1.77         | (1.18-2.67)     | 0.01                  | 1.38           | (1.13-1.68)     | 0.002                 |                |                            |                                |
|                            | LTC4S     | rs3797762  | AA       | 147/371      | REF    | 66/96        | 1.77            | (1.21-2.58)           | 0.003          | 60/101       | 1.55            | (1.06-2.27)           | 0.02           | 1.29            | (1.07-1.55)           | 0.01           |                            |                                |
|                            |           |            | AG+GG    | 252/423      | REF    | 79/153       | 0.89            | (0.64-1.22)           | 0.47           | 70/145       | 0.82            | (0.59-1.14)           | 0.24           | 0.90            | (0.77-1.06)           | 0.22           |                            |                                |
|                            | SEC14L2   | rs2072159  | GG       | 201/457      | REF    | 83/139       | 1.38            | (0.99-1.92)           | 0.05           | 82/132       | 1.43            | (1.03-1.99)           | 0.03           | 1.21            | (1.03-1.42)           | 0.02           |                            |                                |
|                            |           |            | AG+AA    | 204/342      | REF    | 61/108       | 0.97            | (0.67-1.4)            | 0.88           | 47/115       | 0.70            | (0.48-1.03)           | 0.07           | 0.86            | (0.71-1.03)           | 0.10           |                            |                                |
| UCP2                       | rs2306820 | TT         | 194/399  | REF          | 81/97  | 1.73         | (1.21-2.46)     | 0.002                 | 76/103         | 1.53         | (1.08-2.17)     | 0.02                  | 1.28           | (1.08-1.52)     | 0.005                 |                |                            |                                |
|                            |           | CT+CC      | 212/404  | REF          | 64/152 | 0.83         | (0.59-1.17)     | 0.29                  | 55/144         | 0.75         | (0.52-1.07)     | 0.11                  | 0.86           | (0.72-1.02)     | 0.09                  |                |                            |                                |
| rs599277                   | GG        | 124/248    | REF      | 49/55        | 1.80   | (1.13-2.84)  | 0.01            | 49/63                 | 1.58           | (1.02-2.46)  | 0.04            | 1.30                  | (1.05-1.61)    | 0.02            |                       |                |                            |                                |
|                            | AG+AA     | 281/553    | REF      | 96/195       | 0.99   | (0.74-1.33)  | 0.96            | 82/184                | 0.90           | (0.66-1.21)  | 0.47            | 0.95                  | (0.82-1.10)    | 0.51            |                       |                |                            |                                |
| <b><u>Herbicides</u></b>   |           |            |          |              |        |              |                 |                       |                |              |                 |                       |                |                 |                       |                |                            |                                |
| Alachlor                   | ABCG5     | rs1835815  | CC       | 141/270      | REF    | 90/186       | 0.92            | (0.66-1.29)           | 0.64           | 75/213       | 0.68            | (0.48-0.95)           | 0.02           | 0.83            | (0.70-0.98)           | 0.03           | 0.002                      | 0.02                           |
|                            |           |            | CT+TT    | 136/276      | REF    | 110/202      | 1.09            | (0.80-1.50)           | 0.58           | 119/174      | 1.37            | (1.01-1.88)           | 0.05           | 1.17            | (1.00-1.37)           | 0.05           |                            |                                |

|                          |         |            |       |         |     |         |      |             |       |         |      |             |      |      |             |       |        |       |
|--------------------------|---------|------------|-------|---------|-----|---------|------|-------------|-------|---------|------|-------------|------|------|-------------|-------|--------|-------|
| Atazine                  | LDLR    | rs8110695  | TT    | 128/223 | REF | 181/307 | 1.04 | (0.78-1.40) | 0.79  | 154/315 | 0.86 | (0.64-1.16) | 0.33 | 0.92 | (0.79-1.07) | 0.27  | 0.02   | 0.03  |
|                          |         |            | AT+AA | 60/150  | REF | 92/207  | 1.11 | (0.75-1.66) | 0.59  | 117/199 | 1.49 | (1.01-2.19) | 0.04 | 1.23 | (1.02-1.49) | 0.03  |        |       |
|                          | LRP1    | rs1800159  | GG    | 91/173  | REF | 117/261 | 0.85 | (0.60-1.19) | 0.34  | 108/273 | 0.74 | (0.52-1.05) | 0.09 | 0.86 | (0.73-1.02) | 0.09  | 0.01   | 0.04  |
|                          |         |            | AG+AA | 98/202  | REF | 156/254 | 1.32 | (0.95-1.82) | 0.10  | 165/241 | 1.46 | (1.06-2.02) | 0.02 | 1.20 | (1.02-1.40) | 0.02  |        |       |
| Dicamba                  | ALOX12  | rs7338     | TT    | 254/386 | REF | 116/246 | 0.70 | (0.52-0.94) | 0.02  | 118/264 | 0.66 | (0.49-0.89) | 0.01 | 0.81 | (0.70-0.94) | 0.005 | 0.0001 | 0.001 |
|                          |         |            | CT+CC | 59/173  | REF | 54/112  | 1.30 | (0.80-2.11) | 0.29  | 56/90   | 1.65 | (1.01-2.72) | 0.05 | 1.29 | (1.00-1.65) | 0.05  |        |       |
| EPTC                     | A4GALT  | rs8136914  | AA    | 260/593 | REF | 53/63   | 1.96 | (1.31-2.94) | 0.001 | 39/58   | 1.57 | (1.01-2.44) | 0.04 | 1.36 | (1.11-1.67) | 0.003 | 0.001  | 0.001 |
|                          |         |            | AG+GG | 269/465 | REF | 29/56   | 0.93 | (0.58-1.51) | 0.78  | 21/62   | 0.61 | (0.36-1.03) | 0.06 | 0.81 | (0.64-1.02) | 0.08  |        |       |
|                          | ALOX15  | rs916055   | AA    | 242/433 | REF | 34/45   | 1.38 | (0.85-2.23) | 0.19  | 18/58   | 0.56 | (0.32-0.99) | 0.05 | 0.85 | (0.67-1.09) | 0.19  | 0.01   | 0.01  |
|                          |         |            | AG+GG | 274/592 | REF | 45/70   | 1.47 | (0.98-2.22) | 0.06  | 42/58   | 1.63 | (1.06-2.50) | 0.02 | 1.31 | (1.07-1.60) | 0.01  |        |       |
| Glyphosate               | ALOX5AP | rs9579645  | AA    | 151/241 | REF | 227/433 | 0.84 | (0.64-1.09) | 0.18  | 200/410 | 0.78 | (0.59-1.02) | 0.07 | 0.89 | (0.77-1.02) | 0.08  | 0.004  | 0.02  |
|                          |         |            | AC+CC | 31/91   | REF | 48/109  | 1.25 | (0.73-2.16) | 0.42  | 71/120  | 1.74 | (1.03-2.93) | 0.04 | 1.33 | (1.03-1.72) | 0.03  |        |       |
| Petroleum Oil/Distillate | ACSL5   | rs12098576 | GG    | 379/715 | REF | 35/71   | 0.96 | (0.63-1.47) | 0.86  | 40/84   | 0.93 | (0.62-1.39) | 0.72 | 0.96 | (0.80-1.16) | 0.70  | 0.01   | 0.04  |
|                          |         |            | GT+TT | 109/249 | REF | 17/32   | 1.20 | (0.64-2.26) | 0.57  | 21/19   | 2.54 | (1.31-4.92) | 0.01 | 1.51 | (1.11-2.05) | 0.01  |        |       |
|                          |         | rs876873   | TT    | 369/691 | REF | 32/69   | 0.90 | (0.58-1.39) | 0.62  | 38/80   | 0.93 | (0.61-1.39) | 0.71 | 0.95 | (0.79-1.15) | 0.61  | 0.01   | 0.04  |
|                          |         |            | CT+CC | 119/269 | REF | 20/34   | 1.33 | (0.73-2.41) | 0.35  | 23/21   | 2.46 | (1.31-4.63) | 0.01 | 1.52 | (1.14-2.04) | 0.005 |        |       |
|                          | ALOX5   | rs7099684  | TT    | 281/602 | REF | 33/63   | 1.19 | (0.76-1.86) | 0.45  | 43/60   | 1.56 | (1.03-2.38) | 0.04 | 1.24 | (1.02-1.51) | 0.03  | 0.02   | 0.02  |
|                          |         |            | AT+AA | 200/346 | REF | 19/36   | 0.91 | (0.51-1.63) | 0.76  | 14/41   | 0.60 | (0.32-1.13) | 0.12 | 0.80 | (0.60-1.07) | 0.13  |        |       |
|                          | LRP1    | rs1800159  | GG    | 229/477 | REF | 18/51   | 0.74 | (0.42-1.31) | 0.31  | 20/58   | 0.72 | (0.42-1.23) | 0.23 | 0.83 | (0.65-1.07) | 0.15  | 0.01   | 0.03  |
|                          |         |            | AG+AA | 258/484 | REF | 34/52   | 1.26 | (0.80-2.00) | 0.32  | 41/45   | 1.76 | (1.12-2.77) | 0.01 | 1.32 | (1.07-1.63) | 0.01  |        |       |
|                          |         | rs6581128  | CC    | 227/452 | REF | 21/49   | 0.87 | (0.51-1.49) | 0.61  | 18/51   | 0.70 | (0.40-1.23) | 0.22 | 0.84 | (0.65-1.09) | 0.20  | 0.02   | 0.03  |
|                          |         |            | AC+AA | 261/509 | REF | 31/54   | 1.17 | (0.71-1.87) | 0.52  | 43/50   | 1.73 | (1.12-2.68) | 0.01 | 1.29 | (1.05-1.59) | 0.01  |        |       |
|                          |         | rs7956957  | GG    | 209/417 | REF | 14/44   | 0.66 | (0.35-1.23) | 0.19  | 17/46   | 0.75 | (0.42-1.34) | 0.33 | 0.83 | (0.63-1.09) | 0.17  | 0.02   | 0.03  |
|                          |         |            | CG+CC | 279/547 | REF | 38/59   | 1.32 | (0.85-2.03) | 0.22  | 44/57   | 1.57 | (1.03-2.40) | 0.04 | 1.26 | (1.04-1.54) | 0.02  |        |       |
|                          |         | rs7978567  | CC    | 219/437 | REF | 16/48   | 0.69 | (0.38-1.25) | 0.22  | 20/49   | 0.83 | (0.48-1.43) | 0.49 | 0.87 | (0.67-1.13) | 0.29  | 0.03   | 0.04  |
|                          |         |            | CT+TT | 268/527 | REF | 36/55   | 1.34 | (0.86-2.10) | 0.20  | 41/54   | 1.56 | (1.01-2.41) | 0.05 | 1.26 | (1.03-1.55) | 0.02  |        |       |
| <b>Fungicide</b>         |         |            |       |         |     |         |      |             |       |         |      |             |      |      |             |       |        |       |
| Metalaxyl                | LTC4S   | rs1019443  | AA    | 159/353 | REF | 19/16   | 2.65 | (1.32-5.34) | 0.01  | 16/21   | 1.76 | (0.84-3.70) | 0.14 | 1.51 | (1.07-2.13) | 0.02  | 0.01   | 0.02  |
|                          |         |            | AG+GG | 430/753 | REF | 17/59   | 0.48 | (0.27-0.84) | 0.01  | 29/53   | 0.85 | (0.51-1.42) | 0.54 | 0.83 | (0.65-1.05) | 0.13  |        |       |

<sup>1</sup> Risk estimates adjusted for age and state
